# Supplementary material for: Thermal hysteresis of Morin transition in hematite particles
Source: Royal Society of Chemistry journal article supplement (doi:10.1039/b925371h), 2010-01-01
Supplement: b925371h.pdf [file b925371h.pdf]

## Supporting Information

[Figure 1](#). TEM image (a) and particle size distribution (b) of  $\alpha$ -Fe<sub>2</sub>O<sub>3</sub> particles

[Figure 2](#): IR spectra (a) and TG and DSC analyses (b) of  $\alpha$ -Fe<sub>2</sub>O<sub>3</sub> particles

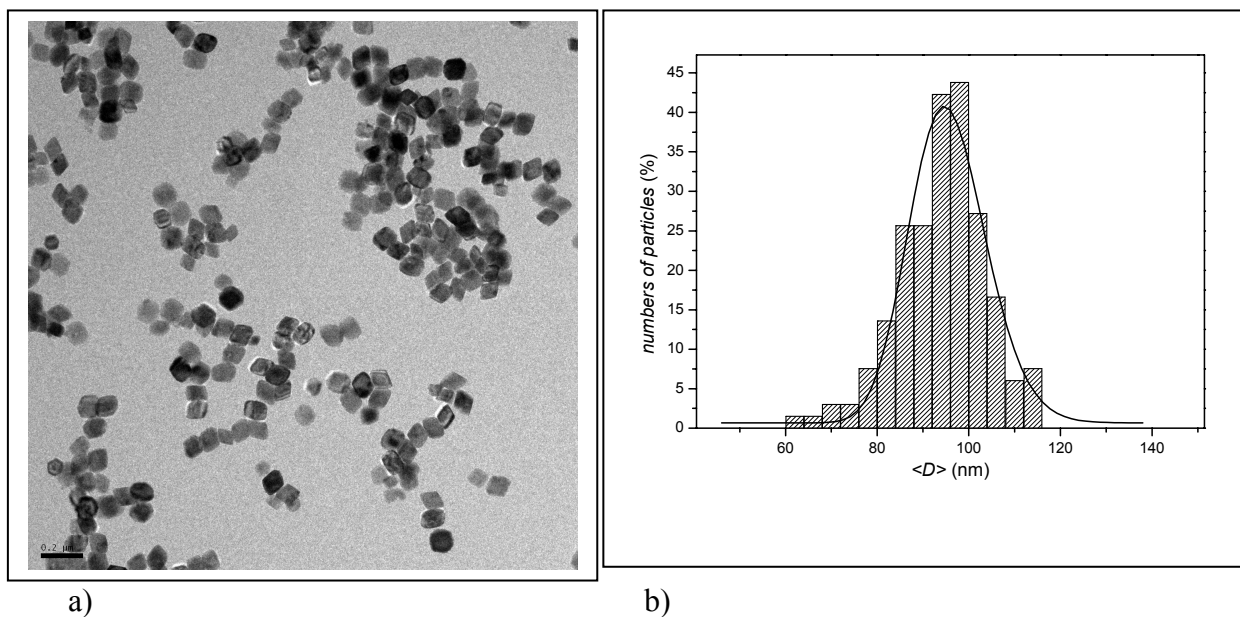

**Figure 1 Supplementary Material**

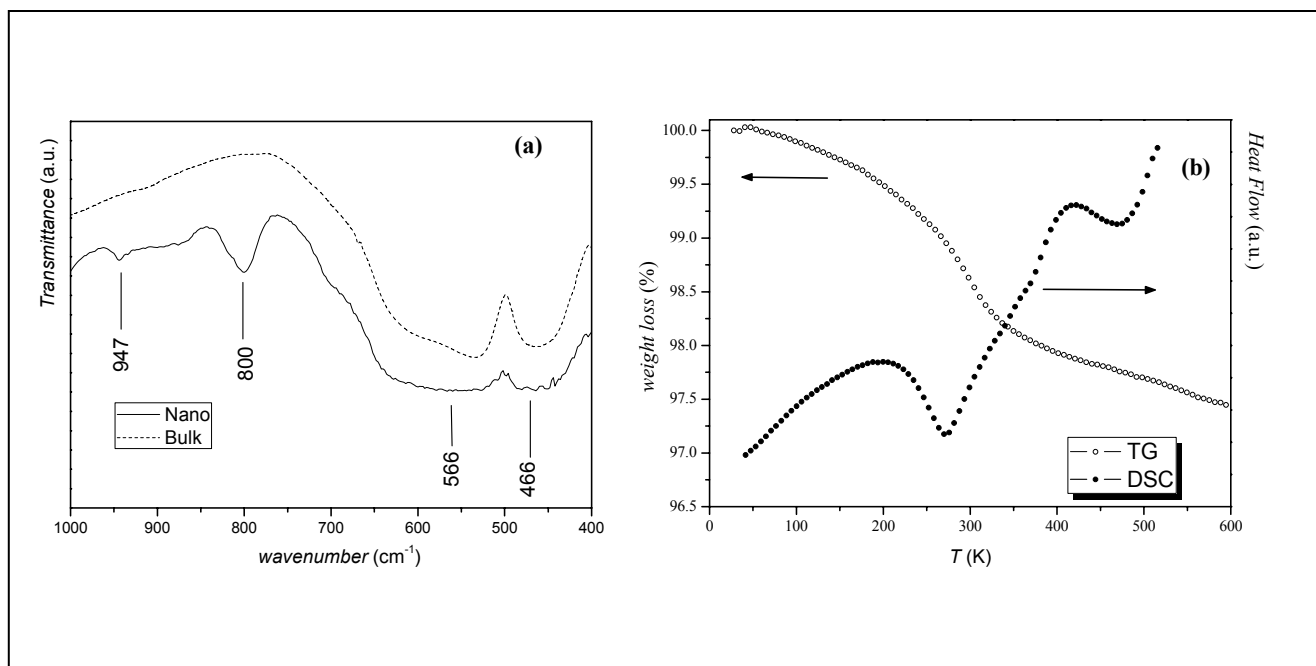

**Figure 2 Supplementary Material**
